# Supplementary material for: Immune Profiling of Gliomas Reveals a Connection with IDH1/2 Mutations, Tau Function and the Vascular Phenotype
Source: PubMed Central journal article supplement (PMC7694073; doi:10.3390/cancers12113230), 2020-11-02
Supplement: cancers-12-03230-s001.pdf [file cancers-12-03230-s001.pdf]

# Supplementary Materials: Immune Profiling of Gliomas Reveals a Connection with IDH1/2 Mutations, Tau Function and the Vascular Phenotype.

Teresa Cejalvo, Ricardo Gargini, Berta Segura-Collar, Pablo Mata-Martínez, Beatriz Herranz, Diana Cantero, Yolanda Ruano, Daniel García-Pérez, Ángel Pérez-Núñez, Ana Ramos, Aurelio Hernández-Lain, María Cruz Martín-Soberón, Pilar Sánchez-Gómez and Juan M. Sepúlveda-Sánchez

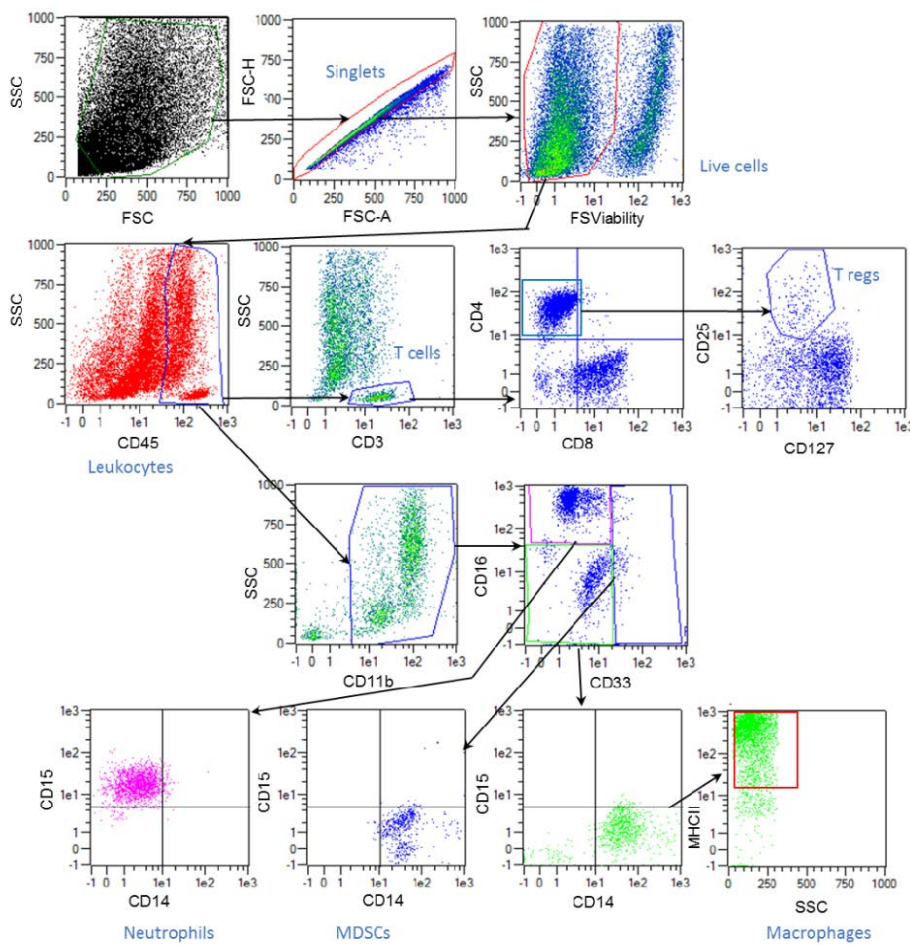

**Figure S1.** Representative plots of the gating on FACS to identify leukocytes and myeloid cells in human glioma tissues. A Fixable Staining for Viable cells detection has been used for excluding dead cells.

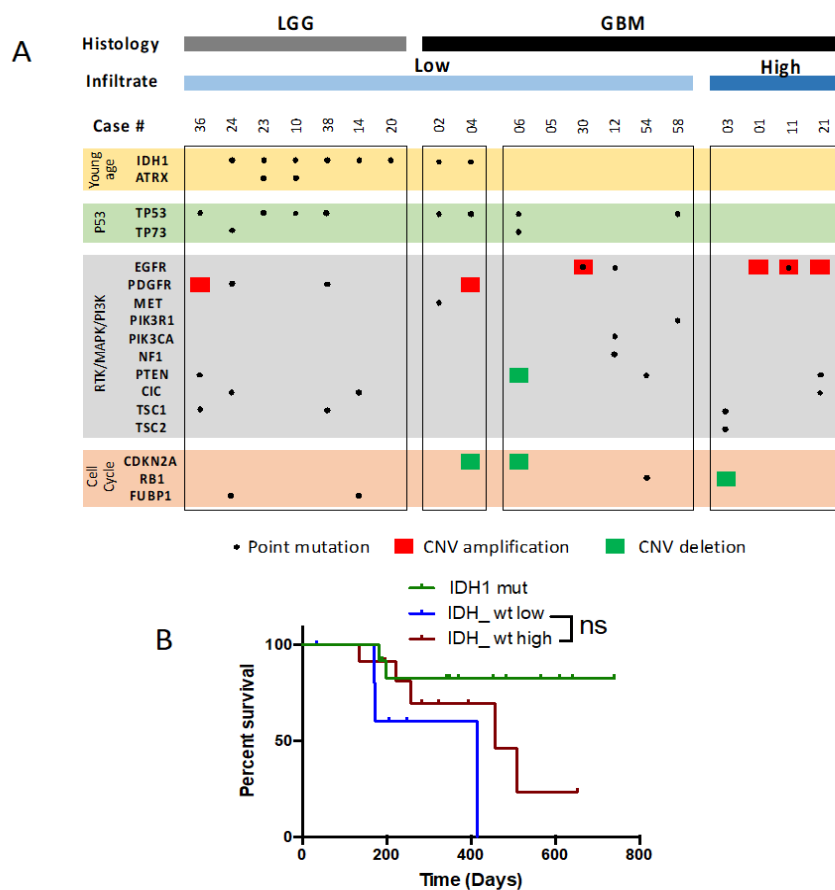

**Figure S2.** Sequencing and Overall survival in de glioma cohort (A) Distribution of point mutations and copy number variations in 20 genes frequently altered in gliomas. (B) Kaplan-Meier survival curves of the three different groups associated with the immune phenotype, IDHmut, GBMwt\_lo, GBMwt\_hi gliomas.

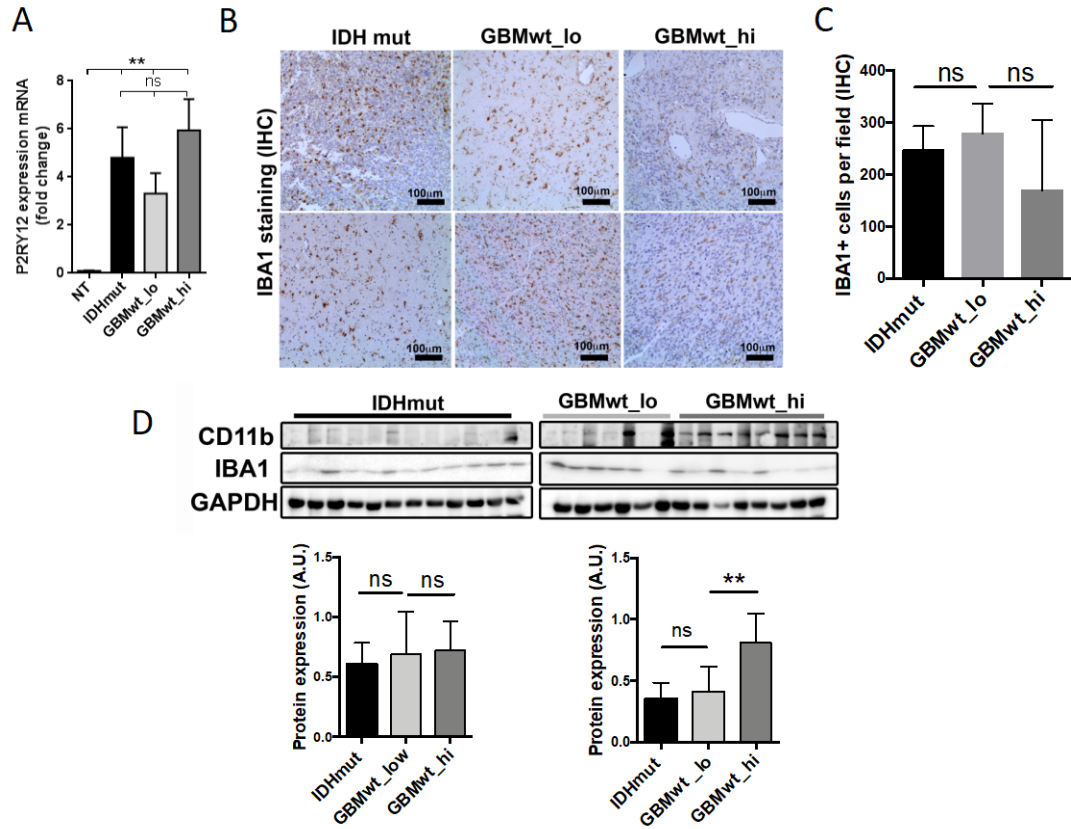

**Figure S3.** Microglia content is similar in IDHmut, GBMwt\_lo, GBMwt\_hi gliomas. **(A)** Fold change values of qRT-PCR analysis of P2RY12 expression in tumor tissue from IDHmut, GBMwt\_lo, GBMwt\_hi ( $n = 6$ ) NT (normal brain tissue). **(B)** Representative pictures obtained from IHQ for IBA1 in the three groups of gliomas. **(C)** Quantification of IBA1 positive cells per field using conventional microscope at 20× from IHQ showed in B ( $n = 6$ ). **(D)** WB analysis of CD11b and IBA1 expression in tumor tissue extracts from IDHmut (black), GBMwt\_lo (light grey), GBMwt\_hi (dark grey) tumors. GAPDH level as a loading control. **(E)** Quantification of levels of CD11b and IBA1 expression from WB showed in D. \*\*  $p < 0.01$ , ns not significant. Scale bars: 100 μm.

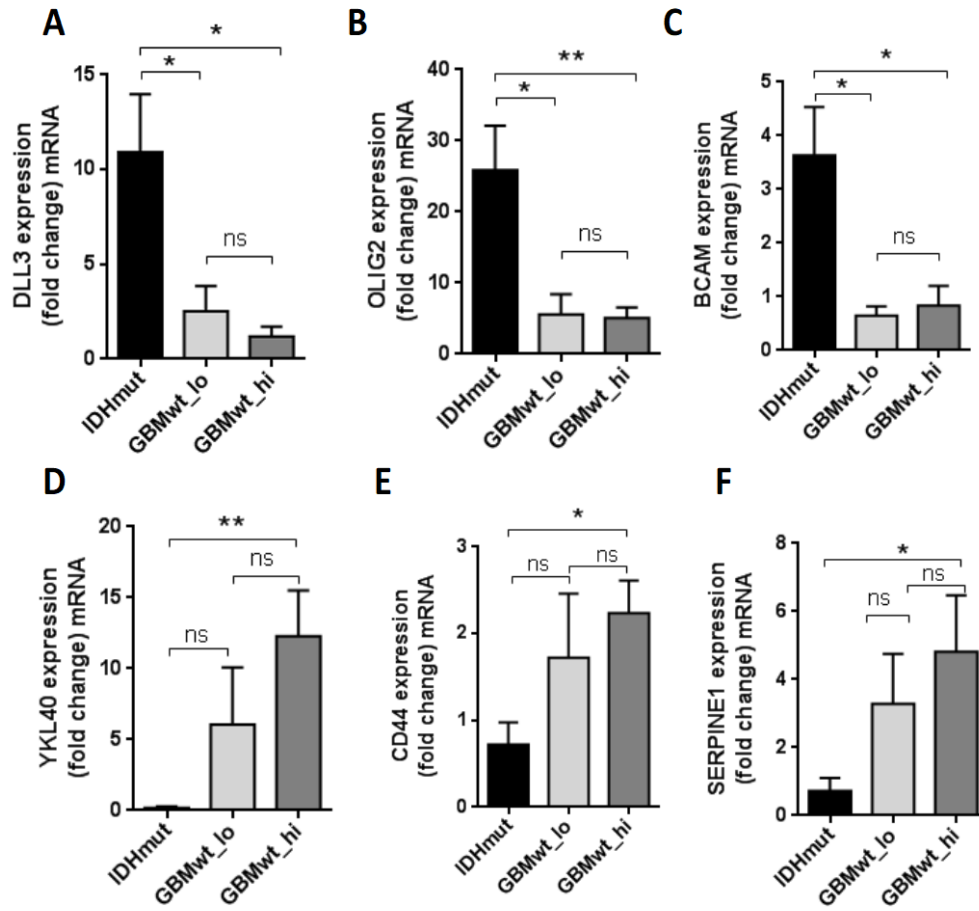

**Figure S4.** Proneural or mesenchymal markers expression in IDHmut, GBMwt\_lo, GBMwt\_hi gliomas. Fold change values of qRT-PCR analysis of expression of (A–C) typical proneural markers as *DLL3*, *OLIG2* and *BCAM*. (D–F) typical mesenchymal markers as *YKL40*, *CD44* and *SERPINE1*. *HPRT* was used for normalization ( $n = 26$ ). \*  $p < 0.05$ , \*\*  $p < 0.01$ , ns not significant.

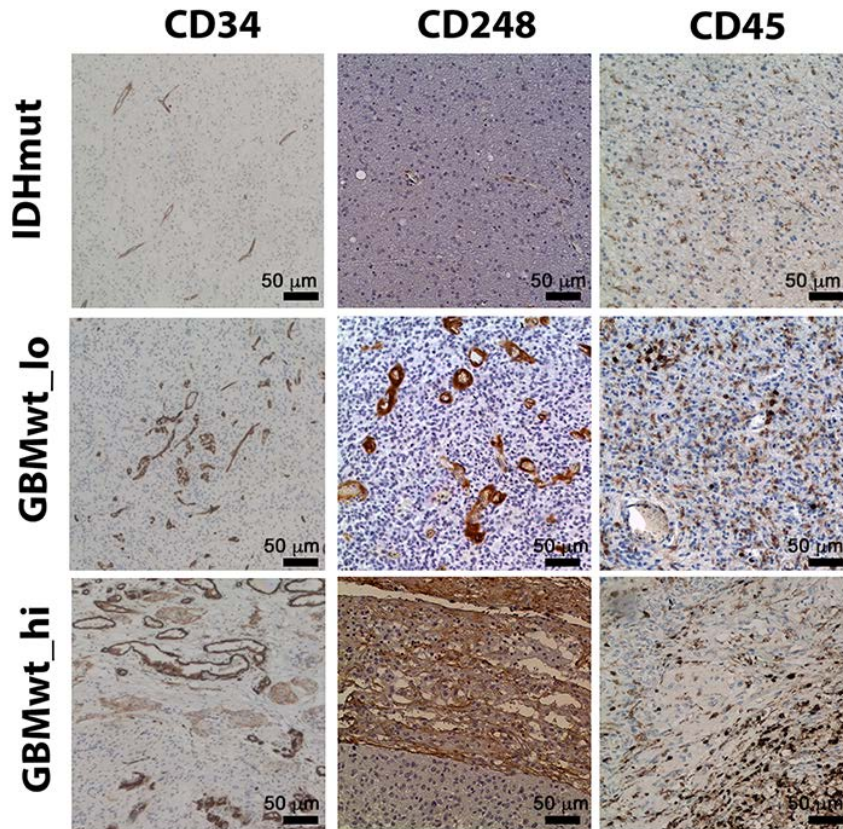

**Figure S5.** Positive correlation between CD34<sup>+</sup> and CD248<sup>+</sup> or CD45<sup>+</sup> cells content in gliomas. Representative pictures from IHQs of CD45 (leukocyte marker), CD34 (endothelial marker) or CD248 (pericyte marker) in each group of gliomas. Scale bars: 50 μm.

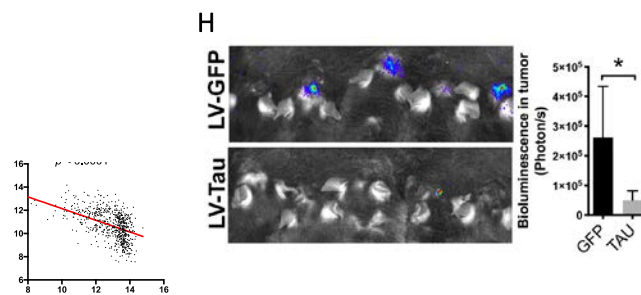

**Figure S6.** Inverse correlation between Tau expression and vascular alterations or immune cells content in gliomas. Correlation of the mRNA expression by RNAseq of *Tau* (*MAPT*) with that of (A) CD34 (B) CD248 (C) CD3E (D) CD4 (E) CD11b and (F) CD68 in gliomas using the TCGA cohort ( $n = 661$ ). (G) Top enriched Gene Ontology (GO) biological process for the cluster of 500 genes which expression is negatively correlated with Tau (*MAPT*) expression in gliomas. LGG+GBM merge cohort

and the DAVID gene ontology program are used. (H) Representative image and quantification of tumor growth using IVIS ILUMINA through luciferase-luciferin system. (I) Kaplan-Meier overall survival curves of patients from the TCGA cohort glioma IDH wt ( $n = 191$ ) and patients in each cohort were stratified into 2 groups based on high and low *Tau/MAPT* expression values, log-rank (Mantel-Cox) test. (J) WB analysis of CD11b and IBA1 expression in tumor tissue extracts from GFP and Tau-GL261. GAPDH level as a loading control and quantification of levels of CD11b and IBA1 expression. \*  $p < 0.05$ , \*\*  $p < 0.01$ , ns not significant.

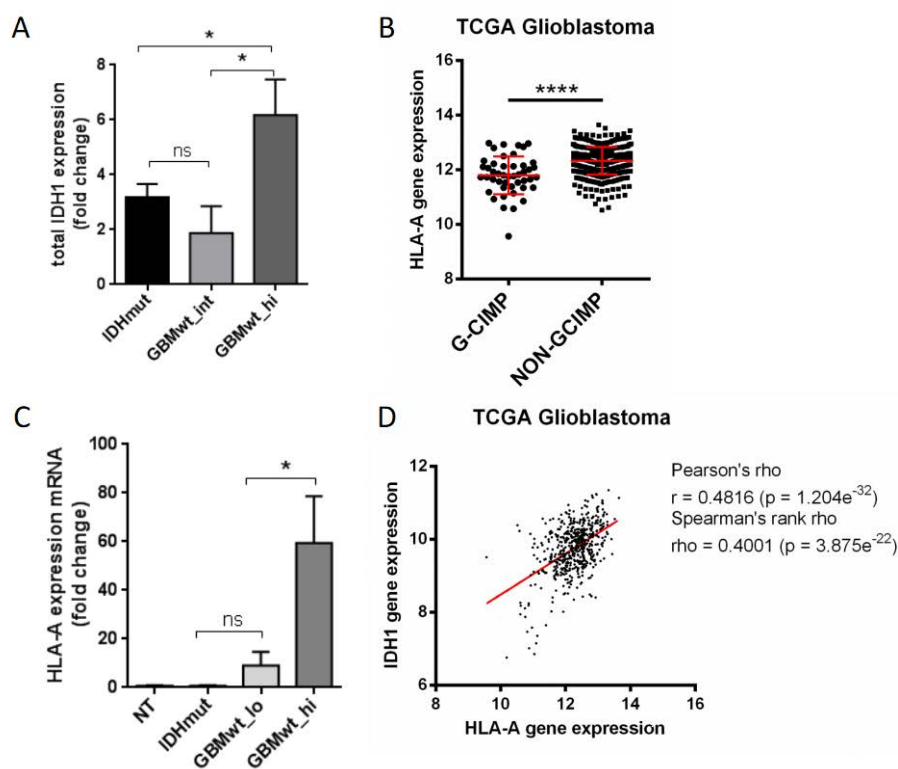

**Figure S7.** Epigenetic changes could explain differences between the groups. (A) Fold change values of qRT-PCR analysis of *IDH1* expression ( $n = 6$ ). (B) Analysis of *HLA-A* mRNA expression by RNAseq in gliomas (TCGA cohort) grouped according to their G-CIMP status (G-CIMP (big circles represent individual tumors)  $n = 46$  and NON-GCIMP (small circles represent individual tumors)  $n = 475$ ). (C) Fold change values of qRT-PCR analysis of *HLA-A* expression ( $n = 6$ ). Normal Tissue (NT). (D) Correlation of the expression mRNA of *IDH1* and *HLA-A* using TCGA glioma cohort ( $n = 539$ ). Paired T-test was performed. \*  $p < 0.05$ , \*\*\*\*  $p < 0.0001$ , ns not significant.

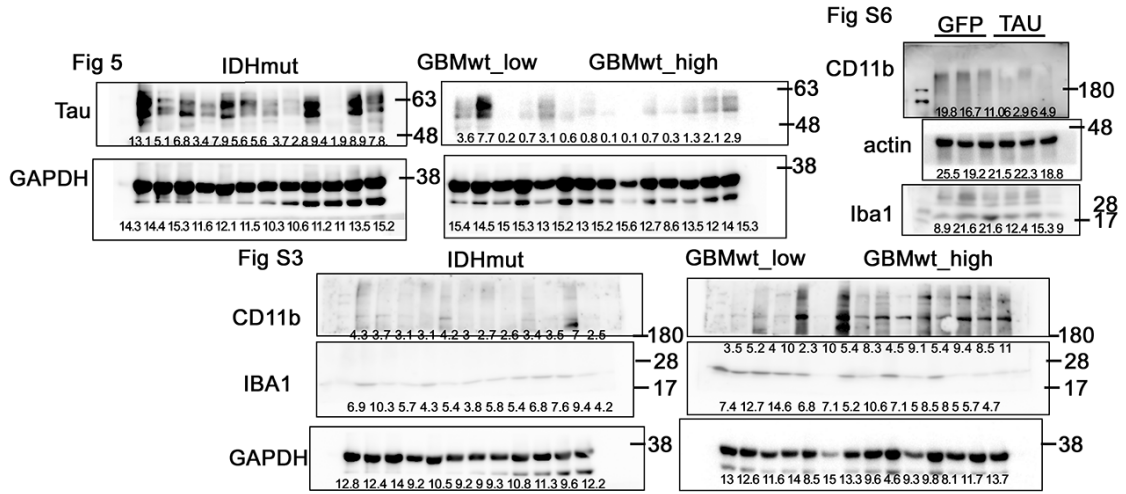

Figure S8. Uncropped western blots.

Table S1. Study patient's characteristics.

| Patient | Age | Gender | Grade of Resection | Diagnosis         | Tumor Grade | IDH | ATRX | Immune Profile | MGMT         | TERT    | 1st Line Treatment | Time to PD | Time of F/U | Status After F/U |
|---------|-----|--------|--------------------|-------------------|-------------|-----|------|----------------|--------------|---------|--------------------|------------|-------------|------------------|
| G001    | 82  | female | complete           | astrocitoma       | IV          | WT  | WT   | GBMwt_hi       | methylated   | C228T   | Stupp              | 4.5        | 7.6         | death            |
| G002    | 36  | female | complete           | astrocitoma       | IV          | Mut | Mut  | IDHmut or LGG  | methylated   | wt      | Stupp              | No PD      | 25          | alive            |
| G003    | 68  | male   | complete           | astrocitoma       | IV          | WT  | Mut  | GBMwt_hi       | methylated   | wt      | Stupp              | 8.2        | 8.9         | death            |
| G004    | 42  | male   | complete           | astrocitoma       | IV          | Mut | Mut. | IDHmut or LGG  | methylated   | wt      | Stupp              | 4.3        | 5.5         | death            |
| G005    | 70  | male   | complete           | astrocitoma       | IV          | WT  | WT   | GBMwt_lo       | methylated   | C228T   | none               | 4.6        | 4.6         | death            |
| G006    | 57  | male   | complete           | astrocitoma       | IV          | WT  | WT   | GBMwt_lo       | methylated   | C228T   | none               | 1          | 1           | death            |
| G007    | 34  | female | complete           | astrocitoma       | IV          | WT  | WT   | GBMwt_hi       | methylated   | wt      | Stupp              | 16.7       | 23          | death            |
| G010    | 30  | female | complete           | astrocitoma       | III         | Mut | Mut  | IDHmut or LGG  | methylated   | wt      | Stupp              | No PD      | 22.4        | alive            |
| G011    | 52  | male   | complete           | astrocitoma       | IV          | WT  | WT   | GBMwt_hi       | unmethylated | C228T   | Stupp              | 17.3       | 21.6        | alive            |
| G012    | 53  | male   | partial            | astrocitoma       | IV          | WT  | WT   | GBMwt_lo       | methylated   | C228T   | Stupp              | 6.6        | 13.6        | death            |
| G014    | 30  | female | partial            | oligodendroglioma | II          | Mut | WT   | IDHmut or LGG  | methylated   | C228T   | RT+PCV             | No PD      | 20          | alive            |
| G020    | 46  | male   | complete           | oligodendroglioma | II          | Mut | WT   | IDHmut or LGG  | methylated   | C228T   | RT+PCV             | No PD      | 18.9        | alive            |
| G021    | 55  | female | complete           | astrocitoma       | IV          | WT  | WT   | GBMwt_hi       | methylated   | wt      | Stupp              | 6.6        | 14.7        | death            |
| G023    | 45  | female | complete           | astrocitoma       | III         | Mut | Mut  | IDHmut or LGG  | methylated   | wt      | Stupp              | No PD      | 14.9        | alive            |
| G024    | 35  | female | complete           | oligodendroglioma | II          | Mut | WT   | IDHmut or LGG  | methylated   | C228T   | none               | No PD      | 16.8        | alive            |
| G030    | 63  | male   | complete           | astrocitoma       | IV          | WT  | WT   | GBMwt_lo       | methylated   | C228T   | Stupp              | 5.5        | 5.5         | death            |
| G035    | 65  | female | complete           | astrocitoma       | IV          | WT  | WT   | GBMwt_hi       | no data      | C228T   | Stupp              | 4          | 14.2        | alive            |
| G036    | 76  | female | partial            | astrocitoma       | III         | WT  | WT   | IDHmut or LGG  | methylated   | C228T   | temozolomide       | 4.1        | 4.2         | death            |
| G038    | 39  | male   | complete           | astrocitoma       | III         | Mut | Mut  | IDHmut or LGG  | no data      | wt      | Stupp              | No PD      | 13.3        | alive            |
| G039    | 47  | male   | complete           | astrocitoma       | IV          | Mut | Mut. | IDHmut or LGG  | methylated   | wt      | Stupp              | No PD      | 13          | alive            |
| G043    | 38  | male   | partial            | astrocitoma       | III         | Mut | Mut. | IDHmut or LGG  | methylated   | C228T   | Stupp              | No PD      | 12          | alive            |
| G045    | 65  | male   | complete           | astrocitoma       | IV          | WT  | WT   | GBMwt_hi       | no data      | no data | Stupp              | No PD      | 11          | alive            |
| G048    | 69  | female | complete           | astrocitoma       | IV          | WT  | WT   | GBMwt_hi       | no data      | C228T   | Stupp              | 9.3        | 10.6        | alive            |
| G054    | 42  | male   | complete           | astrocitoma       | IV          | WT  | WT   | GBMwt_lo       | no data      | wt      | Stupp              | No PD      | 9.7         | alive            |
| G055    | 71  | female | partial            | astrocitoma       | IV          | WT  | WT   | GBMwt_hi       | methylated   | C228T   | none               | 4.4        | 4.4         | death            |
| G058    | 70  | male   | complete           | astrocitoma       | IV          | WT  | WT   | GBMwt_lo       | methylated   | C250T   | Stupp              | No PD      | 7.6         | alive            |
| G059    | 50  | male   | complete           | astrocitoma       | III         | WT  | WT   | IDHmut or LGG  | unmethylated | C228T   | Stupp              | No PD      | 7.2         | alive            |



|      |    |      |          |             |    |    |    |          |            |       |       |       |     |       |
|------|----|------|----------|-------------|----|----|----|----------|------------|-------|-------|-------|-----|-------|
| G060 | 50 | male | complete | astrocitoma | IV | WT | WT | GBMwt_hi | methyalted | C228T | Stupp | No PD | 7.1 | alive |
|------|----|------|----------|-------------|----|----|----|----------|------------|-------|-------|-------|-----|-------|

**Table S2.** List of antibodies used for flow cytometry (FACS), Western Blot (WB) and immunohistochemistry (IHC) analysis.

| Purpose | Antigen   | Conjugated | Catalog Number | Supplier   | Clone             |
|---------|-----------|------------|----------------|------------|-------------------|
| FACS    | cd25      | 421        | 302629         | Biolegend  | BC96              |
|         | cd3       | vg         | 563109         | BD         | UCHT1             |
|         | cd45      | 488        | 130-080-202    | Miltenyi   | REA747            |
|         | cd127     | pe         | 561028         | BD         | HIL-7R-M21        |
|         | cd8       | pecy5      | 565310         | BD         | SK1               |
|         | cd4       | 647        | 300520         | Biolegend  | RPA-T4            |
|         | pd1       | 421        | 562516         | BD         | EH12.1            |
|         | cd16      | 421        | 302037         | Biolegend  | 3G8               |
|         | cd14      | pe         | 130-110-577    | Miltenyi   | REA599            |
|         | cd15      | vg         | 301910         | Biolegend  | HI98              |
|         | cd33      | pecy5      | 366615         | Biolegend  | P67.6             |
|         | cd11b     | 647        | 130-098-087    | Miltenyi   | M1/70             |
|         | pd11      | vg         | 329713         | Biolegend  | 29E.2A3           |
|         | cd206     | pecy5      | 321121         | Biolegend  | 15-2              |
|         | mhcii     | 421        | 562805         | BD         | G46-6             |
| WB      | CD11b     | Purified   | SAB1305652     | Sigma      | 40TST             |
|         | IBA1      | Purified   | ab16588        | Abcam      | EPR 16588         |
|         | GAPDH     | Purified   | sc-47724       | Santa cruz | 0411              |
|         | Tau       | Purified   | 577801         | CALBIOCHEM | Tau-5             |
| IHC     | CD34      | Purified   | NCL-L-END      | Leica      | QBEND/10          |
|         | CD248     | Purified   | 564994         | BD         | B1/35             |
|         | CD45      | Purified   | M0701          | Dako       | 2B11 + PD7/26     |
|         | CD3       | Purified   | A0452          | Dako       | Polyclonal Rabbit |
|         | endomucin | Purified   | sc-65495       | Santa cruz | (V.7C7)           |

**Table S3.** List of primers used for qRT-PCR analysis.

| Genes          | Forward (5'-3')          | Reverse (3'-5')          |
|----------------|--------------------------|--------------------------|
| hBCA           | CTGTCTGGAGAGAACTGCGT     | TCTTGCAGGTGTAGGACAGG     |
| hCD248         | AGACCACCACTCATTTCCTGGAA  | AGTTGGGATAATGGGAAGCGTGGT |
| hCD34          | CCCTCAGTGTCTACTGCTGGTCT  | GGAATAGCTCTGGTGGCTTGCA   |
| hCD44          | AGAAGGTGTGGGCAGAAGAA     | AAATGCACCATTTCCTGAGA     |
| hDLL3          | AAACCTATGGGCTTGAGGAG     | CGCTGAGTACAATCAGTGGAA    |
| hEMCN          | GCAAGCACTTCAGCAACCAGCC   | GGATCTGCCTCCAGCACATTC    |
| hIBA1          | CCCTCCAAACTGGAAGGCTTCA   | CTTTAGCTCAGGTGAGTCTTGG   |
| hIDH1          | CTATGATGGTGACGTTGCAGTCG  | CCTCTGCTTCTACTGTCTTGCC   |
| hOLIG2         | CGGCTTTCCTCTATTTGGTT     | GTTACACGGCAGACGCTACA     |
| hP2RY12        | TGCCAAACTGGGACCAGGACCA   | TGGTGGCTTCTGGTAGCGATC    |
| hSERPINE1      | CATAGTGGAAAGTGATAGAT     | ACTCTGTAAATTCGTCTT       |
| hYKL40         | ACACCTGGGAGTGGAAATGAT    | AGTTCCATCCTCCGACAGAC     |
| mCCL12         | GCTACAGGAGAAATCACAAGCAGC | ACGTCTTATCCAAGTGGTTTATGG |
| mCCL17         | TTGTGTTGCGCTGTAGTGCATA   | CAGGAAGTTGGTGAGCTGGTATA  |
| mCCL2          | AGGTCCCCTGTCATGCTTCTG    | TCTCCAGCCTACTCATTGGG     |
| mCCL7          | CAGAAGGATCACCAGTAGTCGG   | ATAGCCTCCTCGACCCACTTCT   |
| mCCL8          | GGGTGCTGAAAAGCTACGAGAG   | GGATCTCCATGTACTACTGACC   |
| mCD248         | TTGATGGCACCTGGACAGAGGA   | TCCAGGTGCAATCTCTGAGGCT   |
| mCD3           | TCTCATTGCGGGACAGGATGGA   | CCTTGGAGATGGCTGTACTGGT   |
| mEMCN          | GCACACACCATGTCACTGCTTC   | CAGCGGATAAACCACAGGCAAA   |
| mICA           | AAACCAGACCCTGGAAGTGCAC   | GCCTGGCATTTCAGAGTCTGCT   |
| mIL-1R         | CTGTTGGTGAGGAATGTGGCTG   | GGCTCAGGATAACAGGTCTGTC   |
| mIL-1 $\alpha$ | ACGGCTGAGTTTCAGTGAGACC   | CACTCTGGTAGGTGTAAGGTGC   |
| mIL-1 $\beta$  | TGACGGACCCAAAAGATGA      | TCTCCACAGCCACAATGAGT     |
| mTNF $\alpha$  | GCCTCTTCTCATTCTGCTTG     | CTGATGAGAGGGAGGCCATT     |

**Publisher's Note:** MDPI stays neutral with regard to jurisdictional claims in published maps and institutional affiliations.

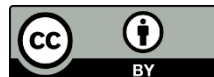

© 2020 by the authors. Licensee MDPI, Basel, Switzerland. This article is an open access article distributed under the terms and conditions of the Creative Commons Attribution (CC BY) license (<http://creativecommons.org/licenses/by/4.0/>).
